# Supplementary material
Source: Elsevier journal article supplement (https://www.sciencedirect.com/science/article/pii/S188898911930103X)
Supplement: mmc1 [file S188898911930103X:mmc1.docx]

**Supplementary files**

1. **Final Questionnaire. Spanish version**
2. ¿Cómo valoras tu estado de salud? (marca con x)

Muy malo

Malo

Regular – Malo

Regular – Bueno

Bueno

Muy Bueno

1. ¿Sientes que tienes libertad para tomar las decisiones importantes de tu vida?

Ninguna

Poca

Bastante

Mucha

1. En relación a las siguientes realidades en tu día a día, puntúa TODAS y CADA UNA de las opciones del 1 al 4 (siendo 1 “nada importante”, 2 “poco importante”, 3 “bastante importante” y 4 “muy importante”).
   - - Trabajar y/o estudiar
     - Necesidades afectivas: amigos, pareja, familia…
     - Dedicar tiempo a actividades placenteras (ocio)
     - Sentirme bien físicamente (aseo, dieta, deporte…)
     - Saber qué va a ser de mí/mi familiar el día de mañana
     - Potenciar mi autonomía
2. En relación al tratamiento psicoterapéutico (psicoterapia), ¿crees que empezó en el momento adecuado? (marca con x)

Si

No

Nunca he tenido tratamiento psicoterapéutico

1. En relación a programas de rehabilitación, talleres, actividades lúdicas, etc. ¿crees que empezaron en el momento adecuado? (marca con x)

Si

No

Nunca he tenido talleres ni programas de rehabilitación

1. En relación al tratamiento médico, ¿crees que empezó en el momento adecuado? (marca con x)

Si

No

1. En relación a las siguientes ayudas que te pueden ofrecer los profesionales, puntúa TODAS y CADA UNA de las opciones del 1 al 4 (siendo 1 “nada importante”, 2 “poco importante”, 3 “bastante importante” y 4 “muy importante”).
   - - Sentirme/nos escuchados
     - Darme/nos más información (síntomas, evolución, dónde
     - encontrar ayuda, qué puedo hacer, medicación…)
     - Investigar sobre nuevos tratamientos
     - Darme/nos participación en las decisiones sobre el tratamiento
     - Adaptar el tratamiento a mis necesidades teniendo en cuenta los efectos secundarios de la medicación.
     - Dedicarme/nos más tiempo
     - Asesorar en los trámites para acceder y compatibilizar el sistema de ayudas económicas
     - Darme participación en la gestión sanitaria de mi centro
2. ¿Te has sentido aceptado y comprendido por tu entorno desde que apareció la enfermedad? (marca con x)

Nada

Poco

Bastante

Mucho

1. En relación a las siguientes iniciativas para erradicar el estigma asociado a la esquizofrenia, puntúa TODAS y CADA UNA de las opciones del 1 al 4 (siendo 1 “nada importante”, 2 “poco importante”, 3 “bastante importante” y 4 “muy importante”)
   - - Campañas de sensibilización
     - Mayor inversión en esquizofrenia en los planes de salud
     - Políticas contra la discriminación
     - Información clara en los medios de comunicación y que no haya noticias sensacionalistas
     - Dar a conocer experiencias de personas afectadas
     - Conocer experiencias de familias
     - Integrar psiquiatría en los centros de especialidades de salud (traumatología, dermatología…)

**B. Final questionnaire. English version.**

1. How do you rate your health in general?

Very bad- Bad-Regular Bad - Regular Good- Good - Very good

1. Do you feel free to make important decisions of your life?

None – A little – Quite – A lot

1. In relation to the following realities in your day to day, rate ALL and EACH of the options from 1 to 4 (1 "not important", 2 "less important", 3 "quite important" and 4 "very important):

- Work and / or study
- Affective needs: friends, significant other, family ...
- Devoted time to leisure activities.
- Feeling good physically (grooming, diet, sport ...)
- To know what will happen to me or to my family in the future
- Boost my autonomy

1. In relation to psychotherapeutic treatment (psychotherapy), do you think it started at the right time?

Yes – No - I have never had psychotherapeutic treatment

1. In relation to rehabilitation programs, workshops, activities playful, etc. Do you think they started at the right moment?

Yes – No - I have never had workshops or rehabilitation programs

1. In relation to medical treatment, do you think it started in the right moment?

Yes – No

1. In relation to the following aids that can be offered by professionals, rate ALL and EACH of the options from 1 to 4 (1 "not important", 2 "unimportant", 3 "quite important" and 4 "very important):

- To feel / to be listened to
- Give me / us more information (symptoms, prognosis, where to find help, what can I do, medication ...)
- To research new treatments
- To give me / us participation in decisions about the treatment
- To adapt the treatment to my needs
- To take into account the side effects of the medication.
- To spend more time in sessions
- To advise on the procedures to access the financial aid system of economic aid
- Give me participation in the health management of my center

1. Have you felt accepted and understood by your environment since the illness appeared?

Yes - No

1. In relation to the following initiatives to eradicate the stigma associated with schizophrenia, score ALL and EACH of the options from 1 to 4 (1 "not important", 2 "unimportant", 3 "quite important" and 4 "very important):

- Awareness Campaigns
- Increased investment in schizophrenia in health plans
- Anti-Discrimination Policies
- Clear information in the media and no sensational news
- Communicate experiences of affected people
- Knowing family experiences
- Integrating psychiatry in health centers (traumatology, dermatology ...)
